# Supplementary material for: Radiation-grafted anion-exchange membranes for reverse electrodialysis: a comparison ofN,N,N′,N′-tetramethylhexane-1,6-diamine crosslinking (amination stage) and divinylbenzene crosslinking (grafting stage)
Source: Royal Society of Chemistry journal article supplement (doi:10.1039/d1ta05166k), 2021-01-01
Supplement: d1ta05166k1.pdf [file d1ta05166k1.pdf]

## Electronic Supplemental Information: Radiation-grafted anion-exchange membranes: should crosslinking be introduced in the grafting or amination synthesis step?

Rachida Bance-Soualhi, Mehdi Choolaei, Siân A. Franklin, Terry R. Willson, Judy Lee, Daniel K. Whelligan, C. Crean and John R. Varcoe

This ESI document (CC-BY) presents the results of screening experiments used to determine the best diamine to use in the main study. These results were generated in Dr Terry Willson's PhD project [Thesis can be downloaded from <https://epubs.surrey.ac.uk/846392/> (CC-BY-NC)]

### Summary experimental description for diamine screening (full details can be found in the above thesis):

The RG-AEMs were made from 50  $\mu\text{m}$  ETFE films that were electron-beamed to a total absorbed dose = 70 kGy and grafted with vinylbenzyl chloride (mixture of *meta*- and *para*-isomers, 97%, Sigma-Aldrich). The poly(VBC)-grafted membranes were then submerged in aqueous (50 vol%) solutions containing the following diamines: *N,N,N',N'*-tetramethylethylenediamine (TMEDA), *N,N,N',N'*-tetramethylpropane-1,3-diamine (TMPDA), and *N,N,N',N'*-tetramethylhexane-1,6-diamine (TMHDA). In the case of 1,4-diazabicyclo[2.2.2]octane (DABCO), amination was carried out using an aqueous (1 mol dm<sup>-3</sup>) solution. These diamines were selected due to their commercial availability and non-excessive cost. The specific aminations were conducted under reflux at 80°C for 48 h. The resultant RG-AEMs (in the Cl<sup>-</sup> form) were washed several times in ultra-pure water (UPW) then boiled in UPW for 1 h to remove any excess amines. Finally, RG-AEMs were stored under ultra-pure DI water until required. The quaternary ion-exchange capacities (IEC<sub>quat</sub>) of this batch of RG-AEMs were 1.35  $\pm$  0.25 meq g<sup>-1</sup>.

### Data and discussion

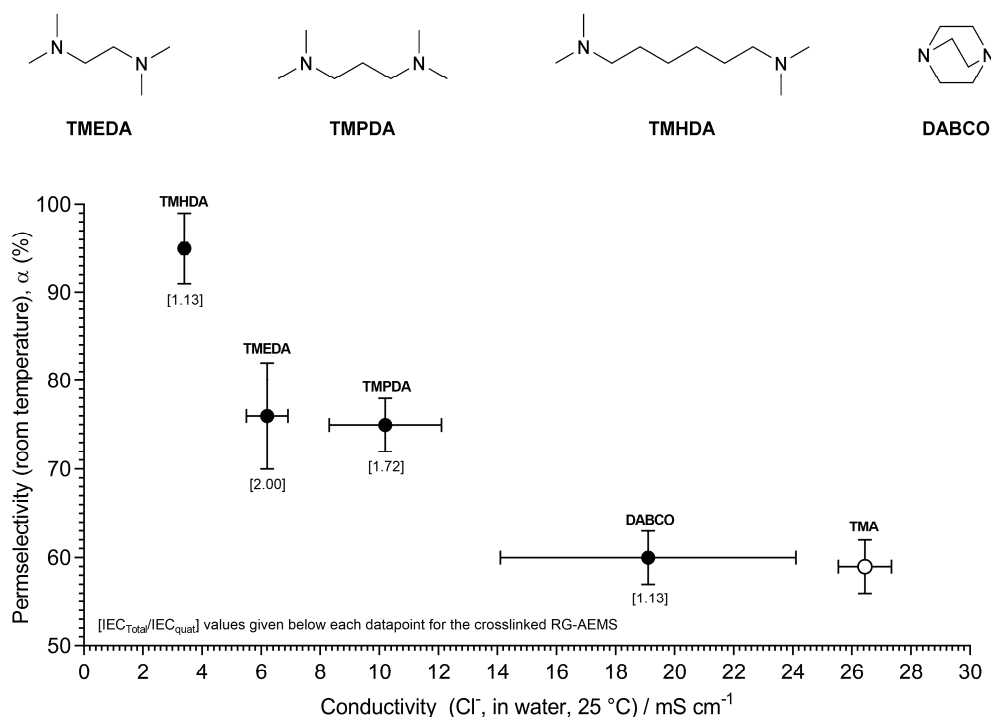

**Figure ESI1** A comparison of the permselectivities and Cl<sup>-</sup> conductivities of the RG-AEMs made using four diamines. A trimethylammonium (TMA) benchmark RG-AEM is also included. Values in [] indicate the ratio of total ion-exchange capacity (IEC<sub>Total</sub>) normalised to quaternary ion-exchange capacity (IEC<sub>Quat</sub>): a ratio = 1 means the diamine reaction is fully crosslinking (diamine has reacted via both nitrogen atoms), a ratio = 2 means the diamine has reacted *via* only a single nitrogen atom (non-crosslinking), while numbers in between indicate intermediate levels of crosslinking.

The data in Figure ESI1 shows that TMEDA and TMPDA react in a predominantly non-crosslinking way. The RG-AEM made with DABCO had the highest conductivity but the lowest permselectivity. Therefore, TMHDA was selected for use in the main study due to the desired effect on permselectivity (target  $\alpha > 90\%$ ).
